# 1 **Recognition of natural objects in the archerfish**

2 Svetlana Volotsky<sup>1,2</sup>, Ohad Ben-Shahar<sup>2,3</sup>, Opher Donchin<sup>2,4</sup>, Ronen Segev<sup>1,2,4\*</sup>

3

4 <sup>1</sup>Department of Biomedical Engineering, Ben-Gurion University of the Negev

5 <sup>2</sup>Zlotowski Center for Neuroscience, Ben-Gurion University of the Negev

6 <sup>3</sup>Department of Computer Science, Ben-Gurion University of the Negev

7 <sup>4</sup>Department of Life Sciences, Ben-Gurion University of the Negev

8 \*Corresponding author

9

10 **Keywords:** Archerfish, visual object recognition, natural objects

11 **Summary:** Archerfish are capable of natural object recognition and categorization based on  
12 small number of visual features.

13

## **Abstract**

14 Recognition of individual objects and their categorization is a complex computational task.  
15 Nevertheless, visual systems are able to perform this task in a rapid and accurate manner.  
16 Humans and other animals can efficiently recognize objects despite countless variations in their  
17 projection on the retina due to different viewing angles, distance, illumination conditions, and  
18 other parameters. Numerous studies conducted in mammals have associated the recognition  
19 process with cortical activity. Although the ability to recognize objects is not limited to  
20 mammals and has been well-documented in other vertebrates that lack a cortex, the mechanism  
21 remains elusive. To address this gap, we explored object recognition in the archerfish, which  
22 lack a fully developed cortex. Archerfish hunt by shooting a jet of water at aerial targets. We  
23 leveraged this unique skill to monitor visual behavior in archerfish by presenting fish with a set  
24 of images on a computer screen above the water tank and observing the behavioral response.  
25 This methodology served to characterize the ability of the archerfish to perform ecologically  
26 relevant recognition of natural objects. We found that archerfish can recognize an individual  
27 object presented under different conditions and that they can also categorize novel objects into  
28 known categories. Manipulating features of these objects revealed that the fish were more  
29 sensitive to object contours than texture and that a small number of features was sufficient for  
30 categorization. Our findings suggest the existence of a complex visual process in the archerfish  
31 visual system that enables object recognition and categorization.

## 32 **Introduction**

33 For their survival, many animal species require the computational capacity to perform a range of  
34 complex object recognition tasks, from identifying a conspecific to recognizing a camouflaged  
35 predator, to classifying an item as edible (DiCarlo et al., 2012; Santos et al., 2001; Suboski and  
36 Templeton, 1989). Object recognition is defined as the ability to rapidly and accurately identify a  
37 specific object (Fig. 1A) or categorize objects into classes (Fig. 1B) despite substantial  
38 differences in the retinal representation of the object or across category members (DiCarlo et al.,  
39 2012). Variations in an object's retinal image are typically caused by the different conditions  
40 under which the object is viewed; for example, its illumination, the viewing distance and angle,  
41 and other environmental characteristics (Biederman and Bar, 1999; DiCarlo and Cox, 2007;  
42 DiCarlo et al., 2012). The ability of animal brains to recognize objects in an efficient and accurate  
43 manner depends on powerful neural computations that enable classification and identification.

44 Although there is convincing evidence that animals outside of the mammalian clade are capable  
45 of object recognition, the mechanisms and formal algorithms underlying this performance  
46 remain poorly understood. Pigeons, for example, are capable of categorizing natural objects,  
47 human faces, and even emotional expressions (Soto and Wasserman, 2014; Watanabe et al.,  
48 2019). Similarly, bees (Avargues-Weber et al., 2010; Giurfa et al., 1997; Werner et al., 2016),  
49 wasps (Oliveira et al., 2015; Sheehan and Tibbetts, 2011), and adult zebrafish (May et al., 2016;  
50 Oliveira et al., 2015) have all been shown to be capable of conspecific visual identification. A  
51 number of studies have indicated that fish also have the capacity to differentiate between  
52 different shapes (Mackintosh and Sutherland, 1963; Siebeck et al., 2009), fish faces (Parker et  
53 al., 2020), and the archerfish can even be trained to discriminate between human faces  
54 (Newport et al., 2016; Newport et al., 2018). Clearly, some of these stimuli, such as human  
55 faces, are not ecologically relevant to birds, insects, or fish, nor do we expect fish to possess  
56 specific brain areas dedicated to face processing, as is the case for humans. Yet, these findings  
57 suggest the existence of a complex visual processing system in the brain that allows for the  
58 extraction of the relevant features of an object, its recognition and categorization.

59 To address these questions concerning the nature of object recognition in non-mammalian  
60 vertebrates, we examined the object recognition of natural objects in the archerfish (*Toxotes*  
61 *chatareus*). The rationale for selecting the archerfish draws, in part, on the potential benefits of

62 studying organisms distant from mammals on the evolutionary scale (Karoubi et al., 2016),  
63 since this may point to additional visual mechanisms or basic principles. At the same time, the  
64 value of the archerfish as an animal model stems from the fact that these fish can be trained to  
65 discriminate stimuli visually, even when presented on a computer screen (Ben-Simon et al.,  
66 2012; Ben-Simon et al., 2012b; Ben-Tov et al., 2015; Ben-Tov et al., 2018; Gabay et al., 2013;  
67 Mokeichev et al., 2010; Newport et al., 2013; Newport et al., 2014; Newport et al., 2015;  
68 Newport, 2021; Reichenthal et al., 2019; Schuster et al., 2004; Schuster, 2007; Vasserman et al.,  
69 2010). By utilizing this fish's remarkable ability to shoot down insects and other small animals  
70 that settle on the foliage above the water line with a jet of water from the mouth (Lüling, 1963),  
71 these fish can be trained to perform an object recognition task and essentially report their  
72 decisions using stimuli in the lab. Thus, the archerfish can provide the fish equivalent of a  
73 discriminative response by a monkey or by a human when performing a recognition task with a  
74 click of a button.

75

## 76 **Methods**

77 **Animals.** Eleven archerfish subjects participated in the experiments. Adult fish (6-14 cm in  
78 length; 10-18 gm) were purchased from a local supplier. The fish were kept separately in 100-  
79 liter aquaria filled with brackish water at 25-29<sup>0</sup> C on a 12-12 hour light-dark cycle. Fish care  
80 and experimental procedures were approved by the Ben-Gurion University of the Negev  
81 Institutional Animal Care and Use Committee and were in accordance with the government  
82 regulations of the State of Israel.

83 **Training.** After a period of acclimatization, inexperienced fish were gradually trained to shoot at  
84 targets presented on a computer screen (VW2245-T, 21.5", BenQ, Taiwan) situated 35±2 cm  
85 above the water level. In the first stage, the fish were trained to shoot at a single black circle on a  
86 white background that appeared at random locations on the screen. A blinking black square  
87 appeared immediately prior to the display of the target in the middle of the screen and was used  
88 as a cue to draw the fish's attention upward. If the fish shot at the target within 15 seconds from  
89 the appearance of the target, it was rewarded with a food pellet. Otherwise, the target  
90 disappeared and the next training trial started. The mean response time of the fish ranged from 2

91 to 10 seconds. The training continued until the fish succeeded in hitting 80% of the targets within  
92 15 seconds.

93 After the fish learned to shoot at targets on the screen, they were trained to recognize either a  
94 specific object or a category through a two-alternative forced choice procedure (Fig. 2A). A  
95 session of 20 trials where the fish had to choose and shoot at one of two images was repeated  
96 over several (4-10) days to familiarize the fish with the experiment. When the fish achieved a  
97 70% success rate in choosing the designated object or category, it was considered trained and  
98 ready for the experiment (examples of the training and experimental procedure for one fish are  
99 shown in Fig. 2B). The subsequent experimental trials were recorded and these results were used  
100 for the analyses.

101 **Stimuli.** For all experiments, we used images of objects familiar to the fish from their natural  
102 environment. The images were composed of edible and inedible objects (from the archerfish's  
103 perspective): the inedible objects were either leaves or flowers, whereas the edible objects were  
104 either spiders or insects such as a cockroach, an ant, or a beetle. The images of the insects and  
105 the spiders were obtained from the BugwoodImages project website ([insectimages.org](http://insectimages.org)). Images  
106 of flowers were taken from the Oxford Flowers 102 dataset (Nilsback and Zisserman, 2008), and  
107 images of leaves were taken from the Flavia Plant Leaf Recognition project dataset (Wu et al.,  
108 2007). Multiple shots of one specific spider and one ant were taken from the animated 3D  
109 models. The models were purchased from the Sketchfab store under standard license  
110 ([sketchfab.com](http://sketchfab.com)).

111 All images were preprocessed using Matlab. All background colors were removed and the  
112 objects, after being converted to grayscale, were placed on a white background. The size of the  
113 objects was randomized in the following way: the number of the pixels in the image was selected  
114 to have a uniform distribution from a discrete set of object sizes. For this purpose, the images  
115 were resized to create 5 levels of object area, defined as the number of pixels within the contour  
116 of the object: ~10,000 pixels, ~50,000 pixels, 100,000 pixels, 200,000 pixels and 300,000 pixels.

117 **Experiment 1.** We investigated recognition of a specific object in the archerfish. The fish were  
118 rewarded with a food pellet if they selected the target. The experiment consisted of ten sessions  
119 (each on a different day) with 20 trials per session, and lasted 3 to 5 weeks with 2-3 sessions per  
120 week.

121 There were two types of targets. First, an image of a specific spider was presented to the fish  
122 together with a distracting object. The distracting objects were leaves, flowers, insects, or other  
123 spiders. The target spider was shown from different viewpoints, with different orientation, size,  
124 contrast, and screen locations. All presentation parameters were randomized.

125 Then, the experiment was repeated with a designated target of a specific ant. The distractors in  
126 this case were images of leaves, flowers, insects, or other ants.

127 **Experiment 2.** Whereas Experiment 1 focused on specific objects (and thus on identification),  
128 Experiment 2 explored the ability of the archerfish to generalize and categorize various objects  
129 into classes. On each trial, two novel images belonging to two different categories – edible and  
130 inedible – were presented in random locations on the screen.

131 **Analysis of image features.** To analyze the possible visual features that may help the fish to  
132 perform object recognition, we extracted a set of 18 visual features commonly used in image  
133 processing from each image (Nixon and Aguado, 2019; Wang et al., 2012; Wen et al., 2009) and  
134 then used these features to characterize the images. The following features were used:

135 **1.** Object area, defined as the number of pixels within the object's perimeter.

136 Features describing object compactness:

137 **2.** Convex hull area.

138 **3.** Convex hull area divided by the object area.

139 **4.** Perimeter length.

140 **5.** Roundness, defined as the perimeter squared divided by  $4\pi$ \*area.

141 Features describing object curvatures:

142 **6.** The number of sharp curves in the object's perimeter was defined as follows: first, the object's  
143 perimeter was divided into sections with a length of 100 pixels each. Then, a second degree  
144 polynomial was fitted to each section, and the polynomial's second derivative was used as the  
145 curvature for every section. Finally, a section with curvature values above the standard deviation  
146 of all values for all sections was considered a sharp curve, which yielded the number of sharp  
147 curves in the object's perimeter.

148 **7.** Average curvature value of the sections with sharp curves as defined in 6.

149 Features describing object shape eccentricity:

150 **8.** Shape eccentricity, defined as the ratio between the foci of the ellipse that surrounds the  
151 object and the length of its major axis.

152 **9.** Convex hull eccentricity, defined as the ratio between the foci of the ellipse that surrounds the  
153 convex hull of an object and the length of its major axis.

154 Features describing object texture:

155 **10.** Entropy of light intensities of the objects pixel values.

156 **11.** Standard deviation of the object's pixel values.

157 **12.** Skewness, defined as the normalized third central moment of the object's pixel value  
158 distribution.

159 **13.** Correlation between the object and a checkerboard: dot product of the object with 5  
160 checkerboards with different checker sizes – 4 to 12 checkers in a row – where the maximum  
161 result was used.

162 Other features:

163 **14.** Correlation between the object and a star: dot product with a star shape to measure the  
164 resemblance of the object to a star.

165 **15.** Symmetry, defined as the distance between two halves of an image on the horizontal and  
166 vertical axis of the image. All images were rotated to align the major axis of the surrounding  
167 ellipse to the x-axis.

168 **16.** Symmetry defined as the Euclidean distance between two halves of the image on the  
169 horizontal and vertical axis of the image silhouette.

170 Image energy:

171 **17.** Mean image energy defined as the average value of all pixels in the image.

172 **18.** Total image energy, defined as the sum of all pixel values in the image.

173 **Support vector machine analysis.** We used Matlab Statistics and the Machine Learning toolbox  
174 functions to build a Support Vector Machine classifier. The classifier was trained using a matrix  
175 with image features and the fish's responses as labels. The training set consisted of a random

176 75% of the images. The resulting support vector machine model was tested on the remaining  
177 25% of the images. The labels that the model returned were compared to the images' true labels  
178 and to the fish's behavioral selection. The average success rate for 20 iterations was used as the  
179 model's success rate. We arranged the features according to the order of their contribution to the  
180 model using a greedy algorithm. At every step, the feature that contributed the most to the  
181 model's success was added.

182 **Statistical analysis.** We performed a hierarchical Bayesian analysis to evaluate the behavior of  
183 each fish in every experiment. The statistical analysis used R 4.0.4 and JAGS 4.3.0 software to  
184 sample the posterior probability distribution of the parameters (Kruschke, 2014). The statistical  
185 model we used had a binomial likelihood:

$$186 \text{ Success Rate}_{\text{exp}, \text{fish}} \sim \text{Bino}_{\text{exp}}(p_{\text{fish}}, N_{\text{fish}}) (1)$$

187 The distribution of the success rate for the different fish,  $p_{\text{fish}}$ , was a beta distribution whose  
188 mode,  $\omega$ , and concentration,  $\kappa$ , were hierarchically determined.

$$189 p_{\text{fish}} \sim \text{Beta}(\omega, \kappa) (2)$$

190 The priors for  $\omega$  and  $\kappa$  were chosen to be uniform and very broad.

191 We used JAGS (Plummer, 2003) to generate 3 chains of 10000 MCMC samples from the joint  
192 posterior probability distribution of the  $p_{\text{fish}}$  for all fish and experiments. Convergence of the  
193 algorithm and sampling properties were tested using the graphical and quantitative methods  
194 outlined in Kruschke, 2014. Using the MCMC samples, we calculated the 95% highest density  
195 interval (HDI) for the fish's behavioral success rate, a range of values in which there was a 95%  
196 posterior probability of finding the parameter. The success rate of the experiment was considered  
197 significantly above the chance level if 95% HDI of its posterior distribution was greater than a  
198 region of practical equivalence (ROPE) of 5% around the chance level of 50%. Similarly, if 95%  
199 HDI of the difference in success rate between the two experiments included the ROPE of 5%  
200 around zero, the success rate was not considered to be different.

201



## 202 **Results**

203 We characterized the archerfish's ability and processing during an ecologically relevant object  
204 recognition task. For this purpose, we conducted two alternative non-forced choice experiments  
205 using a continuous reinforcement schedule for correct responses. Generally, the fish was  
206 presented with images of natural stimuli that are important in the fish habitat, and was rewarded  
207 for an appropriate shooting response. The two stimuli were presented simultaneously on a  
208 computer monitor situated above the water tank (Fig. 2A). A shooting response directed at the  
209 correct target was rewarded with a food pellet whereas the selection of the other stimulus was  
210 not. Successive learning trials were contingent on the fish collecting the reward for the previous  
211 correct response. To neutralize the effect of position bias in the fish's responses, the two targets  
212 were presented at a random location on the screen.

213

### 214 **Archerfish can recognize specific objects regardless of differences in contrast, size, and** 215 **viewing angles**

216 We tested whether the archerfish was capable of object recognition. Three archerfish were  
217 trained on a set of pictures of a single spider viewed from different angles in a 3D space and then  
218 tested on the same spider viewed from other angles (the generalization set), which were not  
219 included in the original set (Fig. 3A). The target spider was presented under different conditions  
220 such that size, viewing angle, contrast and location varied from trial to trial. The target spider  
221 was presented together with another object that could be a leaf, a flower, an insect, or another  
222 spider (Fig. 3A, see Methods).

223 The fish were able to recognize and choose the target spider, both on trials where the second  
224 object was not a spider and also against other spiders (Fig. 3B). For all fish in both experiments,  
225 there was no overlap of the posterior probability 95% HDI of the success rate with a ROPE of  
226 5% around the chance level (see Methods, Statistical analysis). In addition, the 95% HDI of the  
227 difference between the success rate of individual fish on trials with two spiders and the trials  
228 with a spider and non-spider completely contained a ROPE of 5% around chance level,  
229 indicating that the fish could differentiate the target spider from other types of spiders as well as  
230 from other objects.



231 A similar experiment was conducted with an ant as a target image. The same three fish were  
232 retrained to recognize one specific ant that was shown together with other objects, and  
233 sometimes with other ants (Fig. 3C). The fish learned to differentiate the target ant from the other  
234 objects and also from other ants (Fig. 3D). The success rates in this experiment were not  
235 significantly different from the rates in the experiment with a spider target.

236

### 237 **The archerfish can categorize objects into classes and learn to generalize from examples**

238 We tested the ability of the fish to discriminate between the images of two categories of stimuli  
239 (Fig. 4A): non-animals (leaves and flowers) and animals (spiders and insects comprising ants,  
240 beetles and cockroaches). In this two-alternative-choice-task, in the first stage of the experiment,  
241 the animal category was rewarded and the non-animal category was not rewarded. The images  
242 were grayscale, normalized to five different sizes, shown at different locations on the screen and  
243 were never repeated; that is, each image was used only once (around 1,500 images in total were  
244 used in the experiments). After two to eight days, the success rate of the fish reached a plateau  
245 that was significantly above chance level (Fig. 4B). The lower boundary of 95% HDI for the fish  
246 with the lowest success rate was just above 60%. The higher boundary of 95% HDI for the fish  
247 with the highest success rate was above 80%.

248 To test whether archerfish are predisposed to shooting at animals rather than plants, we tested  
249 four additional fish, which were trained to shoot at the non-animal targets (i.e. non-edible).  
250 Again, we found that the archerfish were able to select the non-animal targets at a significantly  
251 higher level than chance (Fig. 4B). This is an indication that the archerfish is not hardwired to  
252 select an animal.

253

### 254 **The archerfish can use five complex visual features to perform object recognition**

255 To identify the visual features used in the behavioral task, we built a model that simulated the  
256 process of object selection in the fish and fit the model to the response data we collected on the  
257 fish target selection. The model was composed of two branches of information processing, each  
258 processing one stimulus image in parallel (Fig. 5A). Each image recognition module was  
259 composed of a feature extraction stage followed by a classifier. The result of the computation

260 by each module was fed into a decision module which, after adding execution noise, led to the  
261 behavioral choice of the model. The decision was made by comparing the classification output  
262 and verifying its consistency. If the classifications were different, the decision followed suit to  
263 the desired class. If both classifiers returned the same category, the decision was made  
264 randomly by sampling a Bernoulli distribution with 0.5 probability of success. The behavioral  
265 noise itself was added to the decision vector: a decision response was flipped for pairs of  
266 images with a probability matched for each fish separately – from 0.65 to 0.8 – to get a success  
267 rate fit for the behavioral result.

268  
269 For the classification module we used a support vector machine classifier. The support vector  
270 machine was fed by visual features extracted from each image (examples in Fig. 5B, see  
271 Methods). We extracted a set of 18 features from each image and then used the support vector  
272 machine to build a classifier based on the fish's responses to the targets and on the extracted  
273 features. The features were selected heuristically for the image set (see Methods).

274  
275 We compared the performance of the support vector machine classifier trained on the raw  
276 images to a classifier trained on a feature matrix and found that the use of features significantly  
277 improved its performance. We also tried classifiers other than the support vector machine.  
278 There was no significant difference in their performance, so we continued with the support  
279 vector machine and features for the remainder of the analysis (Fig. 5C).

280  
281 The classifier was built in an iterative manner, starting with the most informative feature; i.e.,  
282 the feature with the highest success rate when used in the model separately, then adding the next  
283 most informative feature and so on, until the predictive value of the model became saturated.  
284 We used a standard training set, verification set and test set to avoid over-fitting the model.  
285 Although this was a greedy algorithm that could not guarantee an optimal solution, it still  
286 provided a lower bound for the optimal performance.

287  
288 To test the model (Fig. 5A), we used it to simulate the behavioral experiment. The recognition  
289 rate at the output stage of the model matched the behavioral success rate of the fish (Fig. 5D),

290 indicating the capability of the model to capture the statistics of fish behavior. Next, we  
291 analyzed the model structure to reveal aspects of the fish's decisions.

292

### 293 **Shape is more important than texture in the archerfish object recognition**

294 Fig. 5D shows that using only the first five features that describe an object's shape compactness  
295 (ratio of convex hull to area and roundness), shape eccentricity, and texture (entropy and the  
296 local standard deviation), the model's success rate saturated. Using these 5 features, the model  
297 achieved a success rate of 94% compared to a success rate of 95% on all 18 features.

298 We calculated the model's success rate given only the two first shape features; specifically, the  
299 ratio of the convex hull to the area together with eccentricity. The model's predictions were close  
300 to saturation, with a success rate of 92% (Fig. 5E). When given only the two most important  
301 texture features, entropy and the local standard deviation, the model's success rate was only  
302 76%. This suggests that shape was more important than texture in the visual discrimination  
303 performed by these fish.

304 To further test the prediction that shape features were more important than texture, we assessed  
305 the ability of the fish to perform object recognition after removing all textures and leaving only  
306 the silhouette of the image versus removing all the shape information and leaving only texture  
307 (Fig. 6A). The experimental procedure was identical to that used in the original categorization  
308 experiment.

309 We found that the fish were able to perform object discrimination between animals and foliage  
310 when provided only with the shape but failed to do so when provided only with texture (Fig.  
311 6B). This fact, a finding in itself, also increases our confidence in interpreting results from the  
312 model.

313

### 314 **Execution noise drives most fish errors**

315 Allowing the support vector machine classifier to learn from the fish behavioral data enabled it  
316 to perform this categorization task at nearly perfect performance. Our model (Fig. 5A) attributed  
317 the fish errors either to poor classification or to execution noise that was independent of the  
318 images. The red line in the graph in Fig. 5D shows the results of adding execution noise to

319 decisions based on the model's classification. Inspection shows that it matches the performance  
320 of the fish closely.

321 We next conducted a stringent test involving the reexamination of image pairs. It was premised  
322 on the assumption that if the internal image processing mechanism has near-perfect performance,  
323 most errors are the result of execution noise. We predicted that there would be no significant  
324 difference between the success rates of the fish on previously successful and unsuccessful image  
325 pairs.

326 To test this supposition, we repeated the original categorization experiments with four different  
327 sets of images: a. the image pairs that the fish identified correctly. b. The image pairs that the  
328 fish identified incorrectly. c. The image pairs labelled correctly by the model trained on the  
329 results of each specific fish. d. The image pairs that the model labeled incorrectly.

330 The lower bounds of 95% HDI of the success rate for all fish and all types of targets were well  
331 above chance level (Fig. 7A), suggesting that at least part of the errors that the fish made were  
332 due to execution noise and not due to the fish object recognition algorithm's inability to identify  
333 an object.

334 In addition, we compared the selection by the fish and the model for two sets of images: images  
335 that the fish identified correctly in the original experiment and the images that the fish identified  
336 incorrectly. For each image in the two sets, there were four possible outcomes: both the fish and  
337 the model identified it correctly, the fish was correct and the model was incorrect, the fish was  
338 incorrect and the model was correct, and both the fish and the model were incorrect. The success  
339 rate for all these possibilities did not differ from the success rate expected under independence  
340 (Fig. 7B).

341

## 342 **Discussion**

343 Object recognition is an important visual behavior for almost all animals (DiCarlo et al., 2012).  
344 However, investigation of the computational aspects of recognition has been confined largely to  
345 mammalian species, thus narrowing our understanding of visual processing in general, and  
346 limiting the potential for generalizing computational models to new contexts and neural  
347 mechanisms. Here, we extended the study of object recognition to a non-mammalian species, to

348 better understand object recognition in general, regardless of the neural substrate or specific  
349 ecological context.

350 In particular, in this work we explored object recognition of natural objects in the archerfish. At  
351 its core, visual object recognition binds the stimulus to an internal representation of visual  
352 entities that is invariant to most aspects of the stimulus except object identity (DiCarlo and Cox,  
353 2007). This includes invariance to size, contrast, rotation, viewpoint, and illumination, to name  
354 only a few, whose variations result in an infinite number of possible projections of the object  
355 onto the retina. Our results indicate that the archerfish, like primates and several other species,  
356 exhibits this visual function with high accuracy.

357

358 Another important and possibly higher level feature of object recognition is the ability to  
359 categorize objects by generalizing from examples. We tested this ability in the archerfish by  
360 training fish on non-repeating sequences of object images from different classes, and  
361 confronting them with novel stimuli that still belonged to the trained classes (as judged by  
362 humans). The archerfish were indeed able to generalize across wide range of possible objects  
363 and successfully perform the task.

364

365 We analyzed fish behavior using a model that aimed to mimic fish behavior. The model was  
366 built as a three-stage-cascade composed of visual feature extraction, classification with a  
367 learned classifier, and incorporation of additive execution noise before the final decision was  
368 made. When we trained the classifier based on the selection made by the fish, we found that it  
369 achieved almost perfect performance in predicting the true labels of the objects. Furthermore, it  
370 exhibited a hierarchy between features (Fig. 5D), suggesting that the fish attributed more  
371 importance to shape feature than to texture features. The model also supported the hypothesis  
372 that classification errors were mainly due to execution noise and were not image specific. We  
373 tested these two hypotheses with additional experiments and confirmed them both.

374

### 375 **The neural basis of object recognition in the archerfish**

376 Studies suggest that information processing underlying object recognition in the mammalian  
377 brain is organized hierarchically and is anatomically located in the ventral stream of the visual  
378 cortex (Bracci et al., 2017; Felleman and Van Essen, 1991; Grill-Spector et al., 2001). A visual

379 signal is transferred from the retina to the primary visual cortex V1, where basic features such  
380 as oriented lines and edges are extracted (Felleman and Van Essen, 1991; Rust et al., 2005).  
381 Information is then transferred through several cortical areas, which select for combinations of  
382 visual features, such as orientation and spatial frequency, as well as for higher level geometric  
383 features such as curvature (Hegde and Van Essen, 2000). Further downstream, neurons in the  
384 inferior temporal cortex have been reported to process complex object features and be tuned to  
385 specific object classes such as faces or body parts (Cadieu et al., 2007; Fujita, 2002; Gallant et  
386 al., 1996; Lehky and Tanaka, 2016).

387  
388 Less information is available on visual processing in the archerfish. Previous work on the  
389 archerfish have examined visual neural processing in the retina (Segev et al., 2007) and in the  
390 optic tectum (Ben-Tov et al., 2015; Ben-Tov et al., 2013), the latter being the largest visual  
391 processing area in the archerfish brain (Karoubi et al., 2016). The archerfish optic tectum  
392 contains processing stages similar to those found in the early visual system of mammals  
393 (Reichenthal et al., 2018). However, it remains unclear whether this area is also the main brain  
394 region responsible for object recognition in the archerfish or whether other regions, perhaps  
395 within the telencephalon, provide critical functions toward that end.

396

### 397 **Previous studies of object recognition in the archerfish**

398 One of the most seminal studies on object recognition in the archerfish focused on human face  
399 recognition (Newport et al., 2016; Newport et al., 2018). The findings showed that archerfish  
400 could be trained to recognize human faces in that the fish correctly discriminated one specific  
401 face from others, though with apparent difficulty since accuracy decreased markedly on rotated  
402 versions of the same face. By contrast, our results show that the fish could identify the same  
403 object despite various deformations, including rotation. This could be due to the improved  
404 recognition capacity related to the stimuli we used, which were chosen for their ecological  
405 relevance (recall that we used insects and foliage).

406 Other studies have examined the ability of archerfish to recognize simple shapes to test various  
407 forms of fish visual behavior, including visual search (Ben-Tov et al., 2015; Reichenthal et al.,  
408 2019; Reichenthal et al., 2020), symbol-value association and discrimination (Karoubi et al.,  
409 2017) as well as the generalization of the abstract concept of same and different (Newport et

410 al., 2014; Newport et al., 2015). The current study is nevertheless the first to reveal ecologically  
411 relevant object recognition in this species.

412

### 413 **Considerations in modelling fish behavior and limitations**

414 To assess the influence of the specific classifier, we tested several other classifiers including k-  
415 nearest neighbor, discriminant analysis and neural networks. The success rates of these  
416 classifiers were similar to ones observed using the support vector machine both for predicting  
417 image true labels and for predicting fish behavior (Fig. 5C). Therefore, the choice of the  
418 classifier did not appear to significantly affect the results.

419 In addition, naïve application of the support vector machine on the raw images, by trying to  
420 directly reverse-engineer the image features used by the fish, failed. This is probably due to the  
421 high dimensionality of the problem at hand (Afraz et al., 2014). For this reason, we  
422 implemented a feature extraction approach followed by the application of the support vector  
423 machine, which is the standard approach in the field (Brunelli and Poggio, 1993; Chandra and  
424 Bedi, 2018). Finally, it should be noted that our findings do not imply that the neural  
425 computations underlying object recognition in the archerfish actually employ an identical or  
426 similar algorithm to the one generated by our model.

427

### 428 **Conclusion**

429 We examined the ability of archerfish to recognize ecologically relevant objects. Using a model  
430 for the fish selection we showed which visual features were used by the archerfish during visual  
431 processing. Future studies should explore whether and how these visual features are represented  
432 and used in the neural circuitry responsible for object recognition in the archerfish.

433

### 434 **Acknowledgments**

435 We would like to thank Gustavo Glusman, Hadas Wardi and Jolan Nassir for technical  
436 assistance. We gratefully acknowledge financial support from The Israel Science Foundation –  
437 FIRST Program (grant no. 281/15), The Israel Science Foundation – FIRST Program (grant no.  
438 555/19), The Israel Science Foundation (grant no. 211/15), The Human Frontiers Science  
439 Foundation grant RGP0016/2019, the Frankel Center at the Computer Science Department, and



440 the Helmsley Charitable Trust through the Agricultural, Biological and Cognitive Robotics  
441 Initiative of Ben-Gurion University of the Negev.

442

443 **References**

444 **Afraz, A., Yamins, D. L. and DiCarlo, J. J.** (2014). Neural mechanisms underlying visual  
445 object recognition. **79**, 99-107.

446 **Avargues-Weber, A., Portelli, G., Benard, J., Dyer, A. and Giurfa, M.** (2010). Configural  
447 processing enables discrimination and categorization of face-like stimuli in honeybees. *J. Exp.*  
448 *Biol.* **213**, 593-601.

449 **Ben-Simon, A., Ben-Shahar, O., Vasserman, G., Ben-Tov, M. and Segev, R.** (2012). Visual  
450 acuity in the archerfish: behavior, anatomy, and neurophysiology. *Journal of vision* **12**, 18-18.

451 **Ben-Simon, A., Ben-Shahar, O., Vasserman, G. and Segev, R.** (2012). Predictive saccade in  
452 the absence of smooth pursuit: interception of moving targets in the archer fish. *J. Exp. Biol.* **215**,  
453 4248-4254.

454 **Ben-Tov, M., Ben-Shahar, O. and Segev, R.** (2018). What a predator can teach us about visual  
455 processing: a lesson from the archerfish. *Curr. Opin. Neurobiol.* **52**, 80-87.

456 **Ben-Tov, M., Donchin, O., Ben-Shahar, O. and Segev, R.** (2015). Pop-out in visual search of  
457 moving targets in the archer fish. *Nature communications* **6**,

- 458 **Ben-Tov, M., Kopilevich, I., Donchin, O., Ben-Shahar, O., Giladi, C. and Segev, R.** (2013).  
459 Visual receptive field properties of cells in the optic tectum of the archer fish. *J. Neurophysiol.*  
460 **110**, 748-759.
- 461 **Biederman, I. and Bar, M.** (1999). One-shot viewpoint invariance in matching novel objects.  
462 *Vision Res.* **39**, 2885-2899.
- 463 **Bracci, S., Ritchie, J. B. and de Beeck, H. O.** (2017). On the partnership between neural  
464 representations of object categories and visual features in the ventral visual pathway.  
465 *Neuropsychologia* **105**, 153-164.
- 466 **Brunelli, R. and Poggio, T.** (1993). Face recognition: Features versus templates. *IEEE Trans.*  
467 *Pattern Anal. Mach. Intell.* **15**, 1042-1052.
- 468 **Cadiou, C., Kouh, M., Pasupathy, A., Connor, C. E., Riesenhuber, M. and Poggio, T.**  
469 (2007). A model of V4 shape selectivity and invariance. *J. Neurophysiol.* **98**, 1733-1750.
- 470 **Chandra, M. A. and Bedi, S.** (2018). Survey on SVM and their application in image  
471 classification. *International Journal of Information Technology*, 1-11.
- 472 **DiCarlo, J. J. and Cox, D. D.** (2007). Untangling invariant object recognition. *Trends Cogn.*  
473 *Sci. (Regul. Ed.)* **11**, 333-341.
- 474 **DiCarlo, J. J., Zoccolan, D. and Rust, N. C.** (2012). How does the brain solve visual object  
475 recognition? *Neuron* **73**, 415-434.

- 476 **Felleman, D. J. and Van Essen, D. C.** (1991). Distributed hierarchical processing in the primate  
477 cerebral cortex. *Cereb. Cortex* **1**, 1-47.
- 478 **Fujita, I.** (2002). The inferior temporal cortex: architecture, computation, and representation. *J.*  
479 *Neurocytol.* **31**, 359-371.
- 480 **Gabay, S., Leibovich, T., Ben-Simon, A., Henik, A. and Segev, R.** (2013). Inhibition of return  
481 in the archer fish. *Nature communications* **4**, 1657.
- 482 **Gallant, J. L., Connor, C. E., Rakshit, S., Lewis, J. W. and Van Essen, D. C.** (1996). Neural  
483 responses to polar, hyperbolic, and Cartesian gratings in area V4 of the macaque monkey. *J.*  
484 *Neurophysiol.* **76**, 2718-2739.
- 485 **Giurfa, M., Vorobyev, M., Brandt, R., Posner, B. and Menzel, R.** (1997). Discrimination of  
486 coloured stimuli by honeybees: alternative use of achromatic and chromatic signals. *Journal of*  
487 *Comparative Physiology A* **180**, 235-243.
- 488 **Grill-Spector, K., Kourtzi, Z. and Kanwisher, N.** (2001). The lateral occipital complex and its  
489 role in object recognition. *Vision Res.* **41**, 1409-1422.
- 490 **Hegde, J. and Van Essen, D. C.** (2000). Selectivity for complex shapes in primate visual area  
491 V2. *J. Neurosci.* **20**, RC61.
- 492 **Karoubi, N., Leibovich, T. and Segev, R.** (2017). Symbol-value association and discrimination  
493 in the archerfish. *PloS one* **12**, e0174044.

- 494 **Karoubi, N., Segev, R. and Wullimann, M. F.** (2016). The Brain of the Archerfish *Toxotes*  
495 *chatareus*: A Nissl-Based Neuroanatomical Atlas and Catecholaminergic/Cholinergic Systems.  
496 *Frontiers in neuroanatomy* **10**,
- 497 **Kruschke, J.** (2014). *Doing Bayesian data analysis: A tutorial with R, JAGS, and Stan*:  
498 Academic Press.
- 499 **Lehky, S. R. and Tanaka, K.** (2016). Neural representation for object recognition in  
500 inferotemporal cortex. *Curr. Opin. Neurobiol.* **37**, 23-35.
- 501 **Lüling, K.** (1963). The archer fish. *Sci. Am.* **209**, 100-109.
- 502 **Mackintosh, J. and Sutherland, N.** (1963). Visual discrimination by the goldfish: The  
503 orientation of rectangles. *Anim. Behav.* **11**, 135-141.
- 504 **May, Z., Morrill, A., Holcombe, A., Johnston, T., Gallup, J., Fouad, K., Schalomon, M. and**  
505 **Hamilton, T. J.** (2016). Object recognition memory in zebrafish. *Behav. Brain Res.* **296**, 199-  
506 210.
- 507 **Mokeichev, A., Segev, R. and Ben-Shahar, O.** (2010). Orientation saliency without visual  
508 cortex and target selection in archer fish. *Proc. Natl. Acad. Sci. U. S. A.* **107**, 16726-16731.
- 509 **Newport, C.** (2021). Abstract concept learning in fish. *Current Opinion in Behavioral Sciences*  
510 **37**, 56-62.
- 511 **Newport, C., Wallis, G., Reshitnyk, Y. and Siebeck, U. E.** (2016). Discrimination of human  
512 faces by archerfish (*Toxotes chatareus*). *Scientific reports* **6**, 27523.

- 513 **Newport, C., Wallis, G. and Siebeck, U. E.** (2014). Concept learning and the use of three  
514 common psychophysical paradigms in the archerfish (*Toxotes chatareus*). *Frontiers in neural*  
515 *circuits* **8**, 39.
- 516 **Newport, C., Wallis, G. and Siebeck, U. E.** (2015). Same/different abstract concept learning by  
517 archerfish (*Toxotes chatareus*). *PloS one* **10**, e0143401.
- 518 **Newport, C., Wallis, G. and Siebeck, U. E.** (2018). Object recognition in fish: accurate  
519 discrimination across novel views of an unfamiliar object category (human faces). *Anim. Behav.*  
520 **145**, 39-49.
- 521 **Newport, C., Wallis, G., Temple, S. E. and Siebeck, U. E.** (2013). Complex, context-  
522 dependent decision strategies of archerfish, *Toxotes chatareus*. *Anim. Behav.* **86**, 1265-1274.
- 523 **Nilsback, M. and Zisserman, A.** (2008). Automated flower classification over a large number  
524 of classes. 722-729.
- 525 **Nixon, M. and Aguado, A.** (2019). *Feature extraction and image processing for computer*  
526 *vision*: Academic press.
- 527 **Oliveira, J., Silveira, M., Chacon, D. and Luchiari, A.** (2015). The zebrafish world of colors  
528 and shapes: preference and discrimination. *Zebrafish* **12**, 166-173.
- 529 **Parker, A. N., Wallis, G. M., Obergrussberger, R. and Siebeck, U. E.** (2020). Categorical  
530 face perception in fish: How a fish brain warps reality to dissociate “same” from “different”. *J.*  
531 *Comp. Neurol.* **528**, 2919-2928.

- 532 **Plummer, M.** (2003). JAGS: A program for analysis of Bayesian graphical models using Gibbs  
533 sampling. **124**, 1-10.
- 534 **Reichenthal, A., Ben-Tov, M., Ben-Shahar, O. and Segev, R.** (2019). What pops out for you  
535 pops out for fish: Four common visual features. *Journal of vision* **19**, 1-1.
- 536 **Reichenthal, A., Ben-Tov, M. and Segev, R.** (2018). Coding Schemes in the Archerfish Optic  
537 Tectum. *Frontiers in neural circuits* **12**, 18.
- 538 **Reichenthal, A., Segev, R. and Ben-Shahar, O.** (2020). Feature integration theory in non-  
539 humans: Spotlight on the archerfish. *Attention, Perception, & Psychophysics* **82**, 752-774.
- 540 **Rust, N. C., Schwartz, O., Movshon, J. A. and Simoncelli, E. P.** (2005). Spatiotemporal  
541 elements of macaque v1 receptive fields. *Neuron* **46**, 945-956.
- 542 **Santos, L. R., Hauser, M. D. and Spelke, E. S.** (2001). Recognition and categorization of  
543 biologically significant objects by rhesus monkeys (*Macaca mulatta*): the domain of food.  
544 *Cognition* **82**, 127-155.
- 545 **Schuster, S., Rossel, S., Schmidtmann, A., Jäger, I. and Poralla, J.** (2004). Archer fish learn  
546 to compensate for complex optical distortions to determine the absolute size of their aerial prey.  
547 *Current Biology* **14**, 1565-1568.
- 548 **Schuster, S.** (2007). Archerfish. *Curr. Biol.* **17**, R494-5.
- 549 **Segev, R., Schneidman, E., Goodhouse, J. and Berry, M. J.** (2007). Role of eye movements in  
550 the retinal code for a size discrimination task. *J. Neurophysiol.* **98**, 1380-1391.

- 551 **Sheehan, M. J. and Tibbetts, E. A.** (2011). Specialized face learning is associated with  
552 individual recognition in paper wasps. *Science* **334**, 1272-1275.
- 553 **Siebeck, U., Litherland, L. and Wallis, G.** (2009). Shape learning and discrimination in reef  
554 fish. *J. Exp. Biol.* **212**, 2113-2119.
- 555 **Soto, F. A. and Wasserman, E. A.** (2014). Mechanisms of object recognition: what we have  
556 learned from pigeons. *Frontiers in neural circuits* **8**, 122.
- 557 **Suboski, M. D. and Templeton, J. J.** (1989). Life skills training for hatchery fish: social  
558 learning and survival. *Fisheries Research* **7**, 343-352.
- 559 **Vasserman, G., Shamir, M., Simon, A. B. and Segev, R.** (2010). Coding “what” and “when”  
560 in the archer fish retina. *PLoS computational biology* **6**, e1000977.
- 561 **Wang, J., Lin, C., Ji, L. and Liang, A.** (2012). A new automatic identification system of insect  
562 images at the order level. *Knowledge-Based Syst.* **33**, 102-110.
- 563 **Watanabe, A., Fujimoto, M., Hirai, K. and Ushitani, T.** (2019). Pigeons discriminate shapes  
564 based on topological features. *Vision Res.* **158**, 120-125.
- 565 **Wen, C., Guyer, D. E. and Li, W.** (2009). Local feature-based identification and classification  
566 for orchard insects. *Biosystems engineering* **104**, 299-307.
- 567 **Werner, A., Stürzl, W. and Zanker, J.** (2016). Object recognition in flight: how do bees  
568 distinguish between 3D shapes? *PloS one* **11**, e0147106.



569 **Wu, S. G., Bao, F. S., Xu, E. Y., Wang, Y., Chang, Y. and Xiang, Q.** (2007). A leaf  
570 recognition algorithm for plant classification using probabilistic neural network. 11-16.

571

## 572 **Figure Captions**

573 **Fig. 1| Object recognition problem:** Object recognition involves the identification of objects  
574 regardless of transformations in size, contrast, orientation or viewing angle. **A.** An example of  
575 object recognition of an object, a specific spider in this case, which needs to be identified in the  
576 presence of other insects. **B.** An example of object recognition of an object class. In this case, an  
577 animal (insect or spider), needs to be recognized in the presence of non-animate objects (leaves  
578 or flowers).

579

580 **Fig. 2| Behavioral experimental setup:** **A.** The archerfish is presented with two objects on the  
581 screen: a target and a distractor. The fish is rewarded if it selects the target image. **B.** Success rate  
582 per day in training process (red) and experiment (blue) of Fish 1.

583

584 **Fig. 3| The archerfish is capable of invariant object recognition:** **A.** Examples of a single  
585 target spider from different viewpoints and with different contrast levels (top row) and other  
586 distractor objects and spiders (bottom row). **B.** Success rate of three archerfish in recognizing the  
587 target spider: mean + 95% HDI. **C.** Examples of a single target ant from different viewpoints and  
588 with different contrast levels (top row) and other distractor objects and ants (bottom row). **D.**  
589 Success rate of three archerfish in recognizing the target ant: mean + 95% HDI.

590

591 **Fig. 4| The archerfish can categorize novel objects into groups:** The fish were trained to  
592 categorize animal and non-animal objects. **A.** Examples of animal objects (insects and spiders,  
593 top row) and non-animal objects (leaves and flowers, bottom row). **B.** Success rate of 8 fish in  
594 selecting an object from its designated category: mean + 95% HDI. Fish 4 to 7 were rewarded for  
595 choosing an animal; fish 8 to 11 were rewarded for choosing a non-animal.

596 **Fig. 5| Model building: A.** In a behavioral experiment, the fish was exposed to two objects,  
597 made a decision about the object category and executed a shot. The support vector machine  
598 classifier was fed with the features extracted from the images. **B.** Examples of the extracted  
599 visual features. **C.** Success rate of different classifiers: support vector machine classifier using  
600 raw images, support vector machine classifier using extracted features, k-nearest neighbor,  
601 discriminant analysis and neural network. **D.** Support vector machine classifier success rate in  
602 predicting the objects' true category (blue line) and the model's success rate in predicting fish  
603 selection (left, red line). Separate features are added in the order of their contribution to the  
604 classifier's success (left); success rate using only two shape features and two texture features  
605 (right). **E.** Support vector machine classifier success rate for combinations of features: two  
606 features of shape and two features of texture.

607

608 **Fig. 6| Shape features are more important to recognition than texture: A.** Examples of  
609 animal target silhouettes and textures (top row) and non-animal target silhouettes and textures  
610 (bottom row). **B.** Success rate at recognizing the target category in the original experiment with  
611 a full object (green bars) and with silhouettes alone (blue bars) and texture alone (red bars) in  
612 three fish. No significant difference in the response rate between the original and the silhouette  
613 experiments: 95% HDI was above the chance level in all fish. In the texture experiment the 95%  
614 HDI range included the chance level of 0.5.

615

616 **Fig. 7| Fish errors are not correlated with object identity: A.** The original experiment in  
617 object categorization was repeated for selected sets of objects: objects that were previously  
618 selected correctly by the fish, objects that were selected incorrectly by the fish, objects that the  
619 model labeled correctly and objects that the model labeled incorrectly. The 95% HDI of the fish  
620 success rate for all sets of objects was above chance level for all three fish that finished all sets.  
621 **B.** Portion of images identified correctly and incorrectly by the fish and by the fish-trained model  
622 from two datasets: the dataset of images selected correctly in the original categorization task by  
623 the fish (top row, left column) and the set of images selected incorrectly by the fish (bottom row,  
624 left column); success rate for the same groups expected under independence (right column).

Figure 1 Volotsky et al.

A

Specific  
Spider

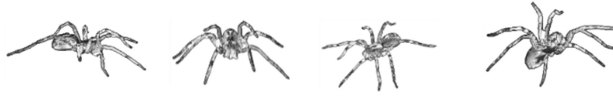

Other  
Objects

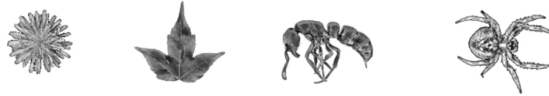

B

Animals

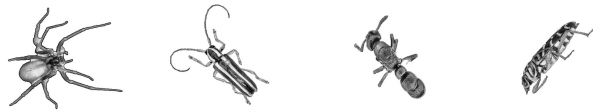

Non-animals

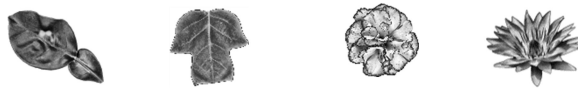

Figure 2 Volotsky et al.

A

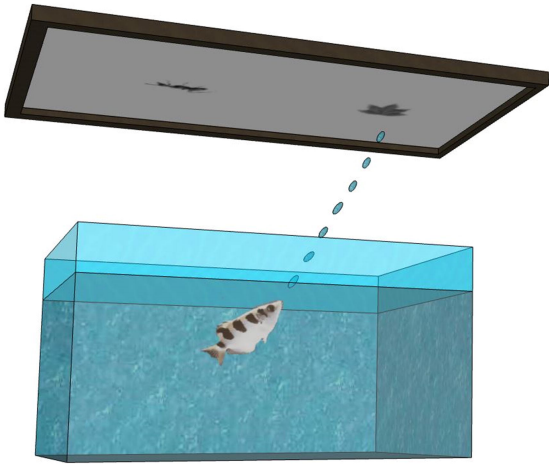

B

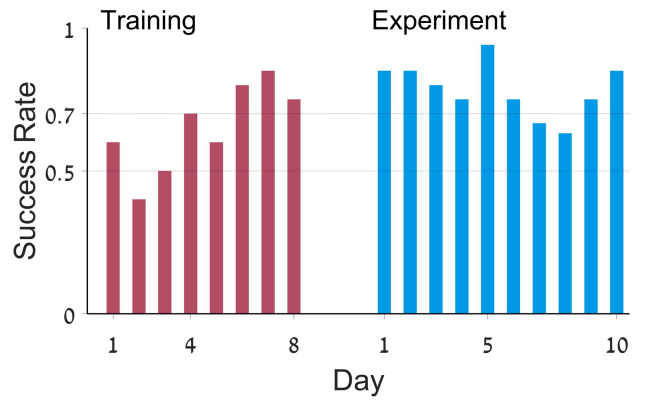

Figure 3 Volotsky et al.

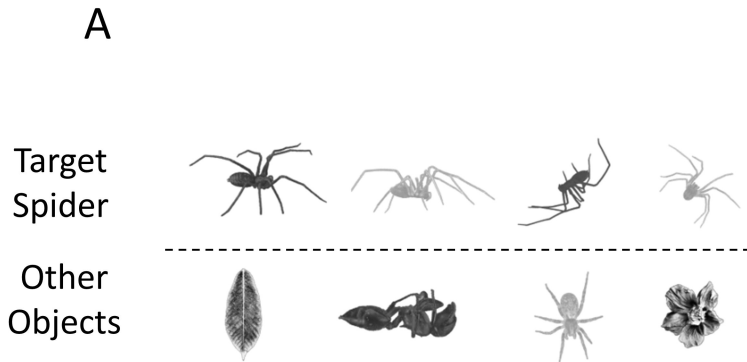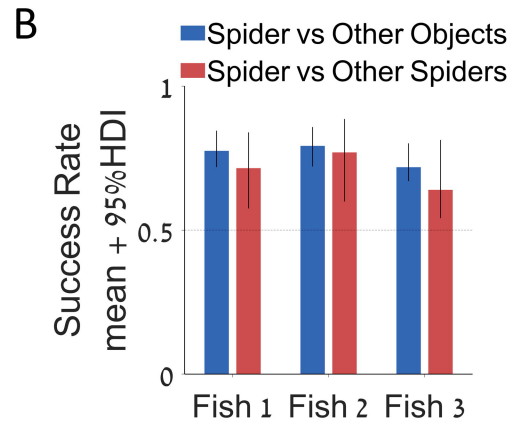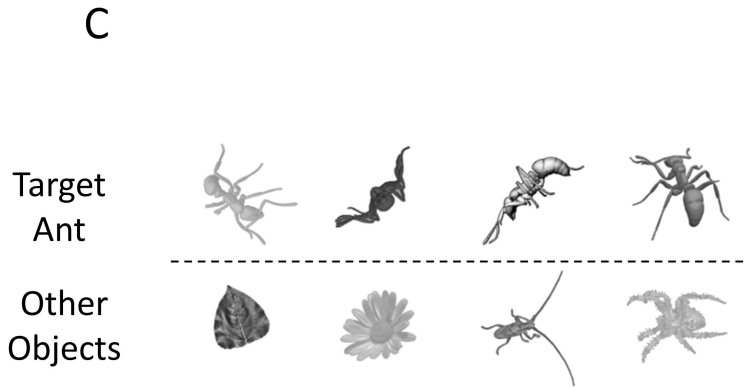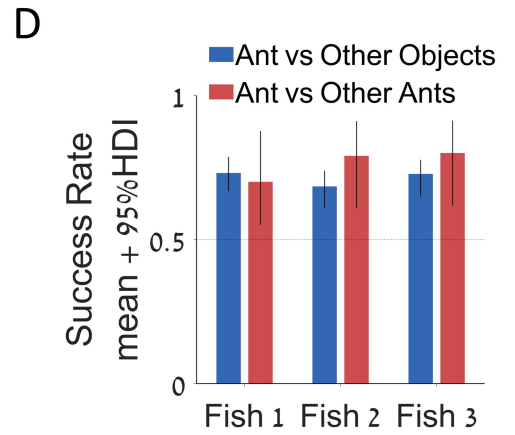

Figure 4 Volotsky et al.

A

Insects and  
Spiders

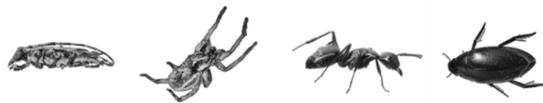

Leaves and  
Flowers

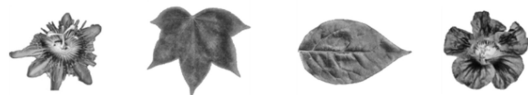

B

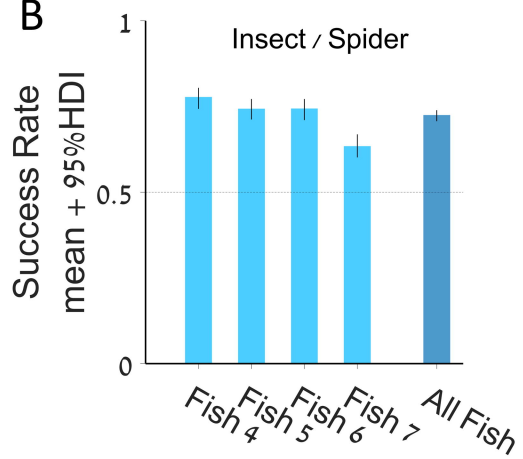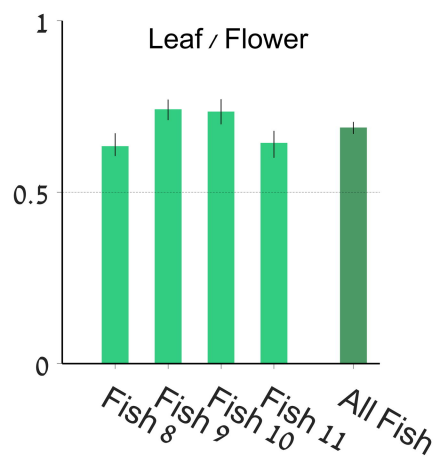

Figure 5 Volotsky et al.

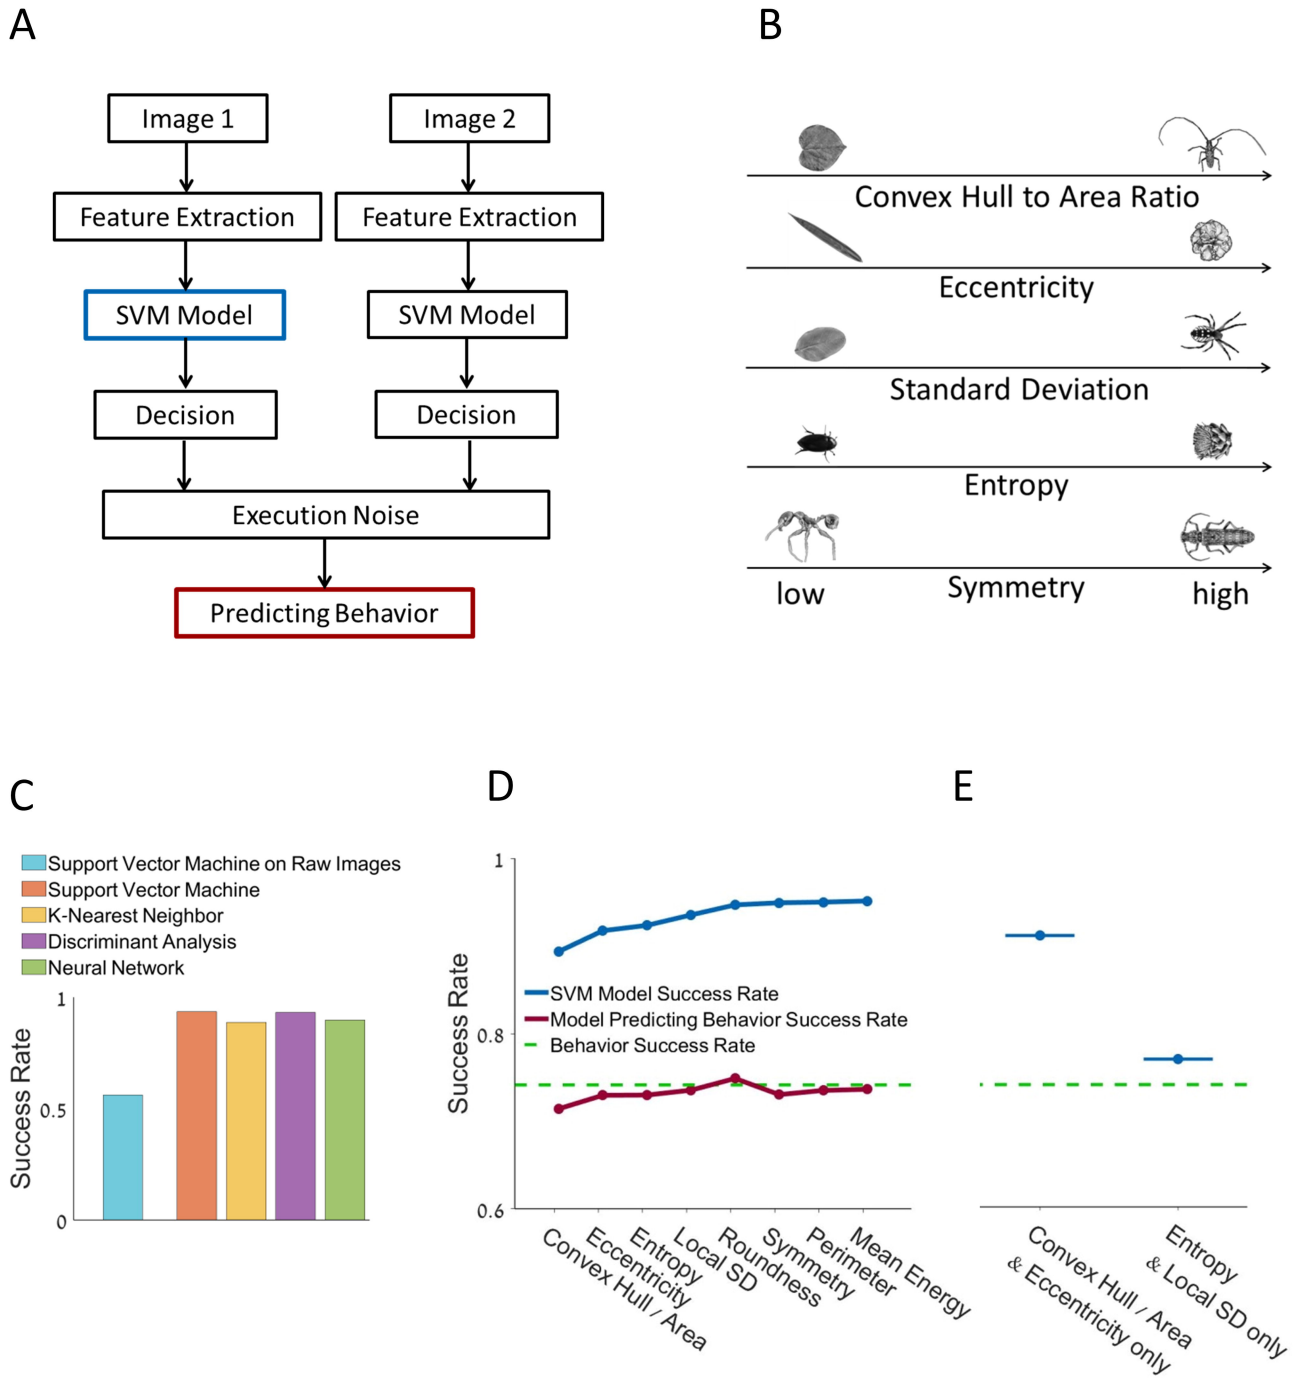



Figure 6 Volotsky et al.

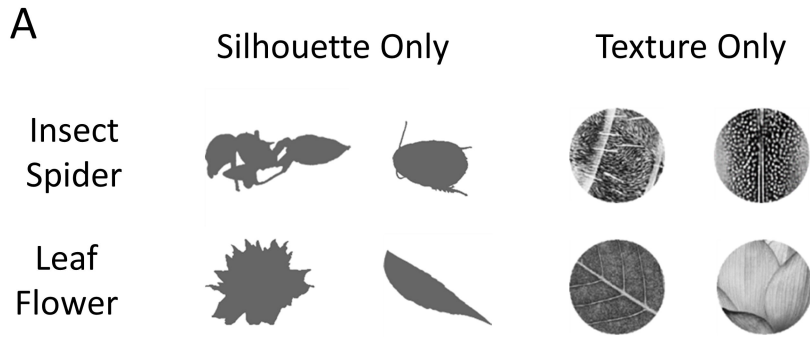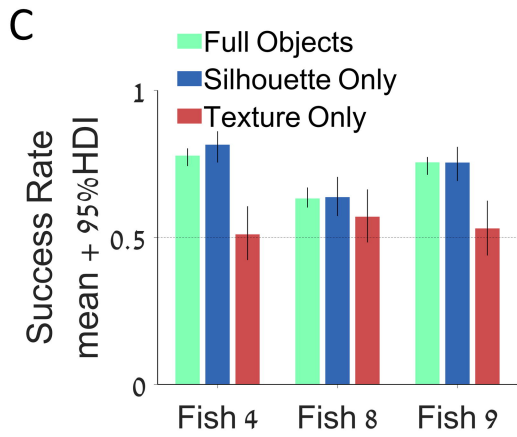

Figure 7 Volotsky et al.

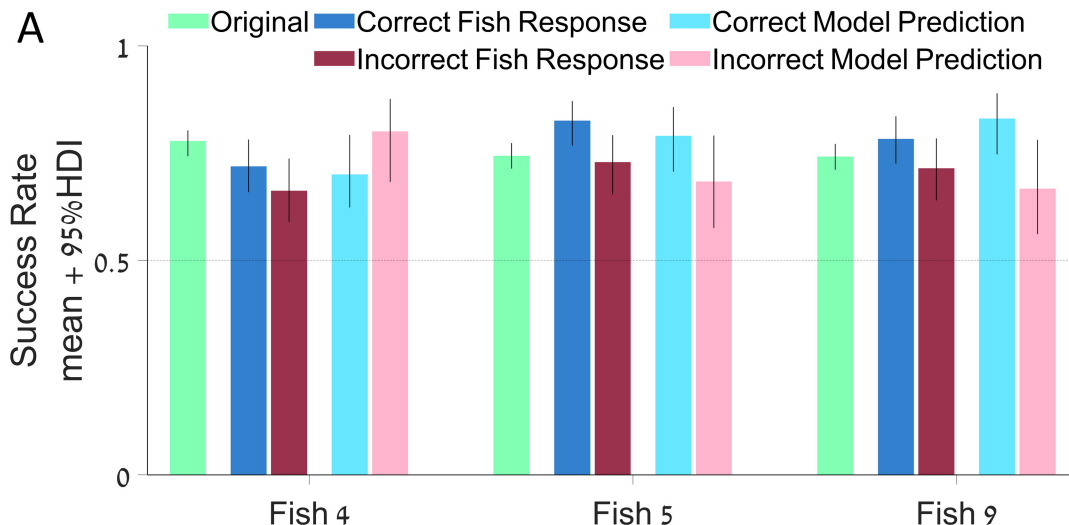

**B**

Re-test success

|                             |                           | Observed                |                           | Expected under independence |                           |
|-----------------------------|---------------------------|-------------------------|---------------------------|-----------------------------|---------------------------|
|                             |                           | Fish selected correctly | Fish Selected incorrectly | Fish selected correctly     | Fish selected incorrectly |
| Originally Correct Images   | Model labeled correctly   | 0.69                    | 0.27                      | 0.69                        | 0.27                      |
|                             | Model labeled incorrectly | 0.03                    | 0.01                      | 0.03                        | 0.01                      |
| Originally Incorrect Images | Model labeled correctly   | 0.63                    | 0.31                      | 0.62                        | 0.32                      |
|                             | Model labeled incorrectly | 0.04                    | 0.03                      | 0.04                        | 0.02                      |
